# Supplementary material for: Engineering hierarchical snowflake-like multi-metal selenide catalysts anchored on Ni foam for high-efficiency and stable overall water splitting
Source: Royal Society of Chemistry journal article supplement (doi:10.1039/d4dt01108b), 2024-01-01
Supplement: d4dt01108b2.pdf [file d4dt01108b2.pdf]

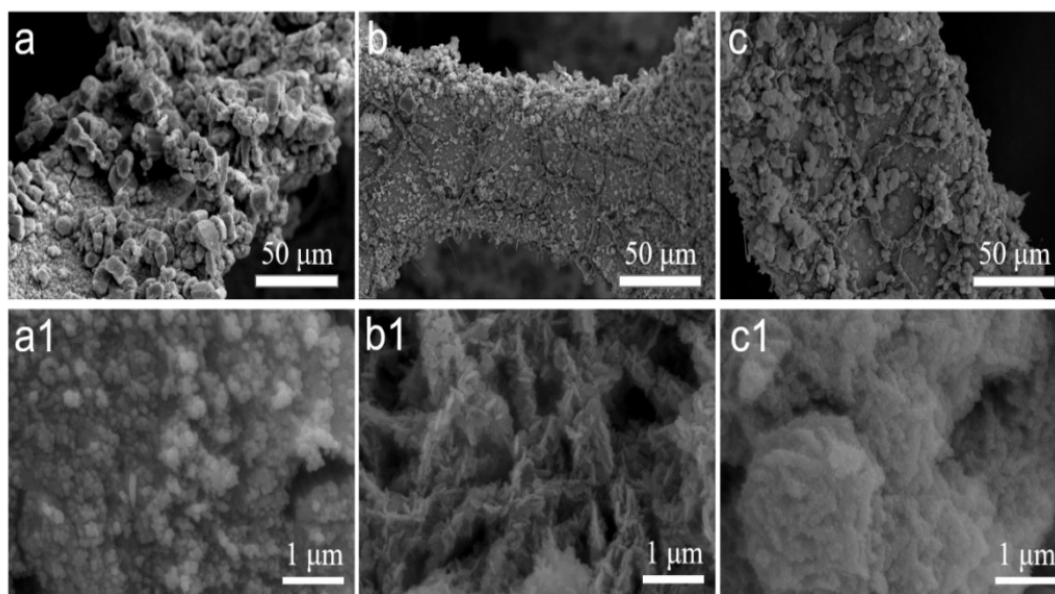

**Fig. S1.** (a)W-CoSe200/NF, (b) W-CoSe300/NF, (c) W-CoSe400/NF SEM with different scanning multiples of (a1)W-CoSe200/NF, (b1) W-CoSe300/NF, (c1) W-CoSe400/NF.

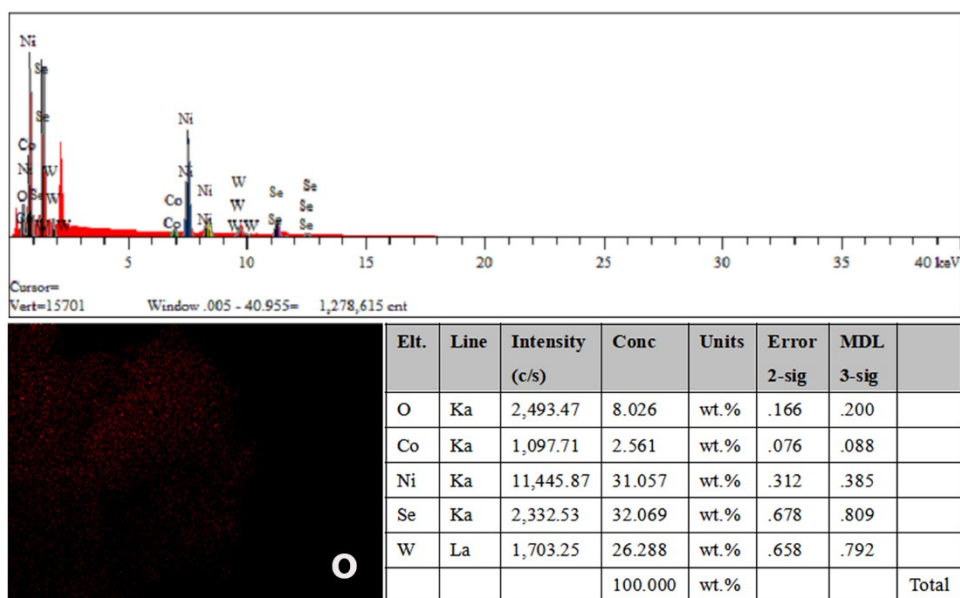

**Fig. S2.** EDS mapping of W-CoSe<sub>300</sub>/NF electrocatalyst and corresponding elemental mass percentage content.

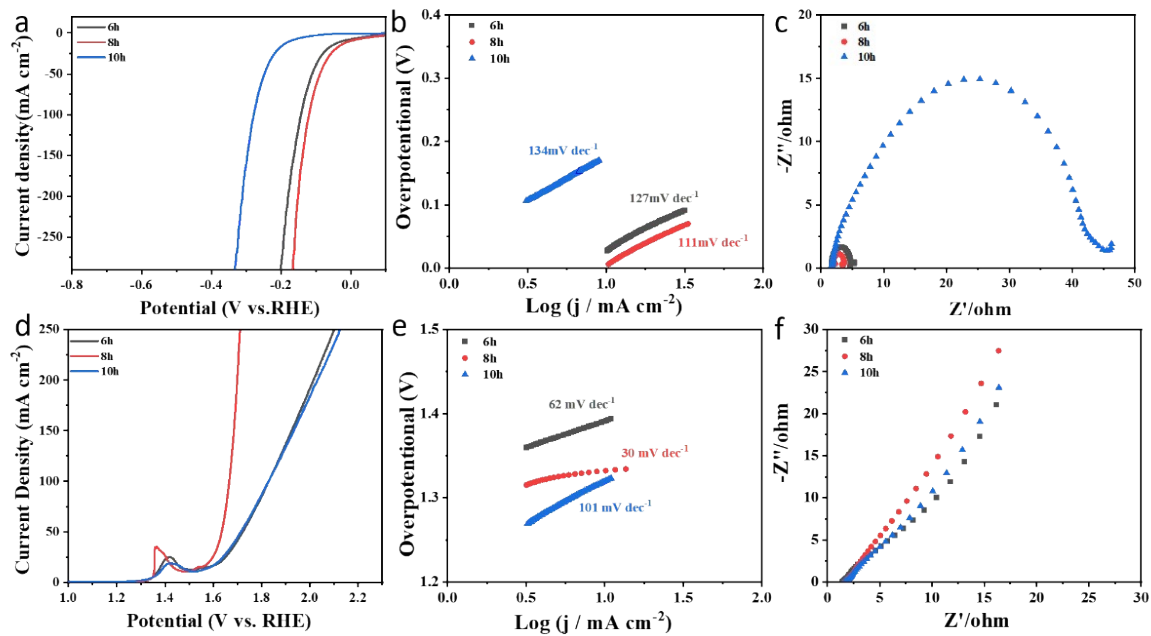

**Fig. S3.** (a) HER polarization curves (b) Tafel (c) EIS and (d) OER polarization curves

(e) Tafel (f) EIS of W-CoO/NF precursors with different reaction times.

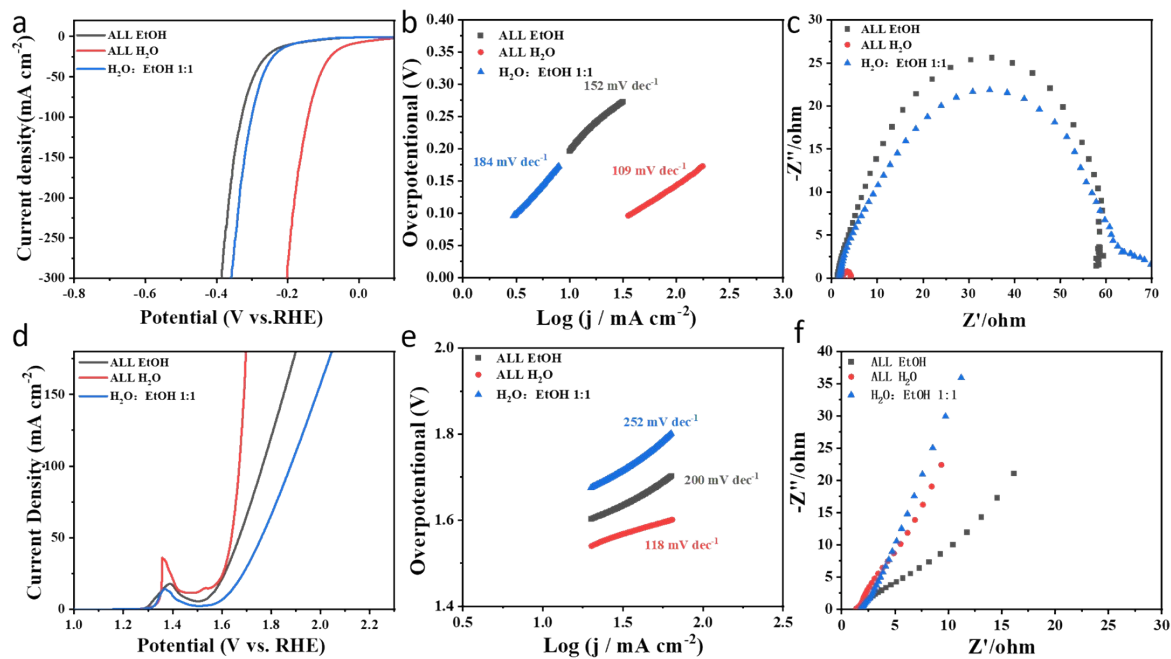

**Fig. S4.** (a) HER polarization curves (b) Tafel (c) EIS and (d) OER polarization curves

(e) Tafel (f) EIS of W-CoO/NF precursors with different solvent ratios.

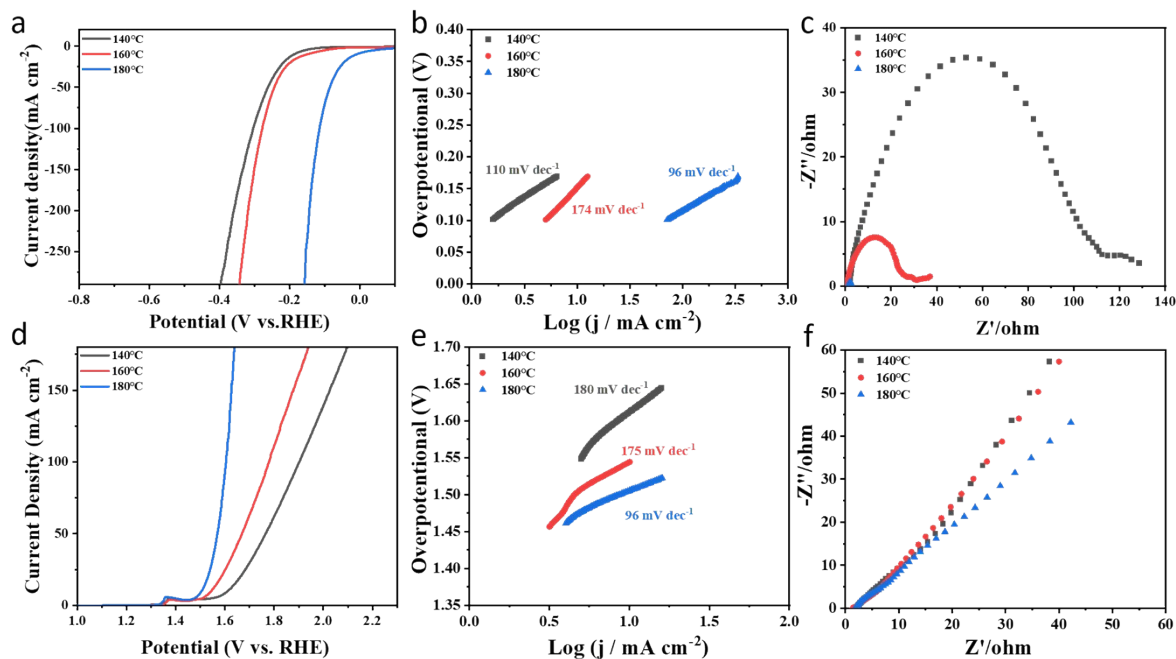

**Fig. S5.** (a) HER polarization curves (b) Tafel (c) EIS and (d) OER polarization curves

(e) Tafel (f) EIS of W-CoO/NF precursors with different reaction temperatures.

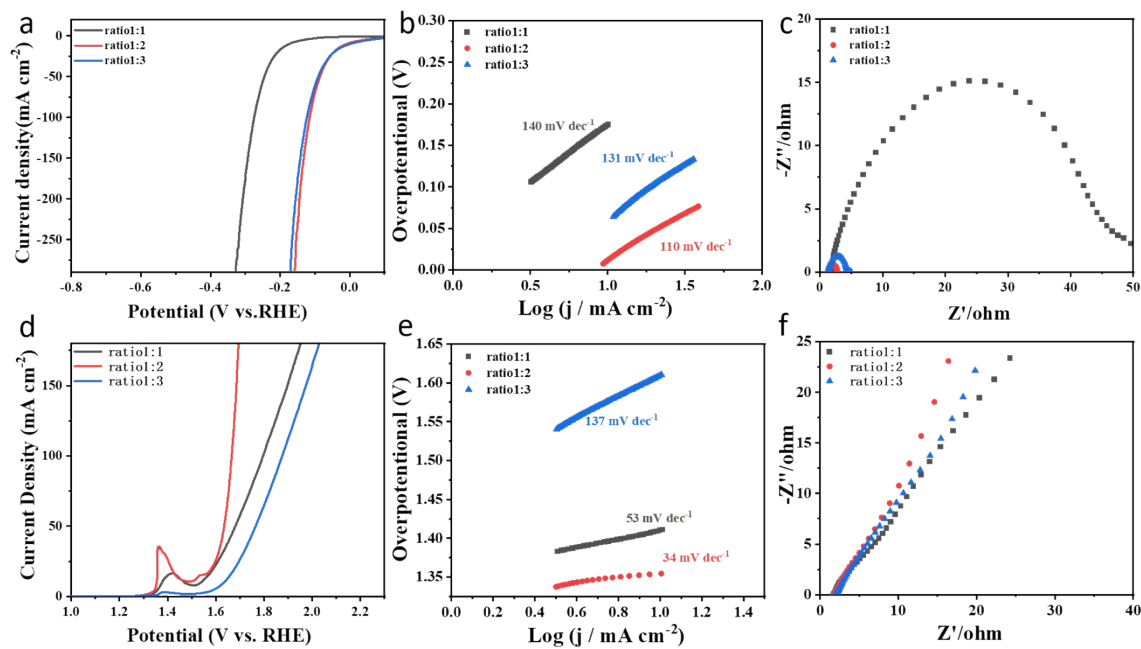

**Fig. S6.** (a) HER polarization curves (b) Tafel (c) EIS and (d) OER polarization curves (e) Tafel (f) EIS of W-CoO/NF precursors with different reaction solute mass ratio.

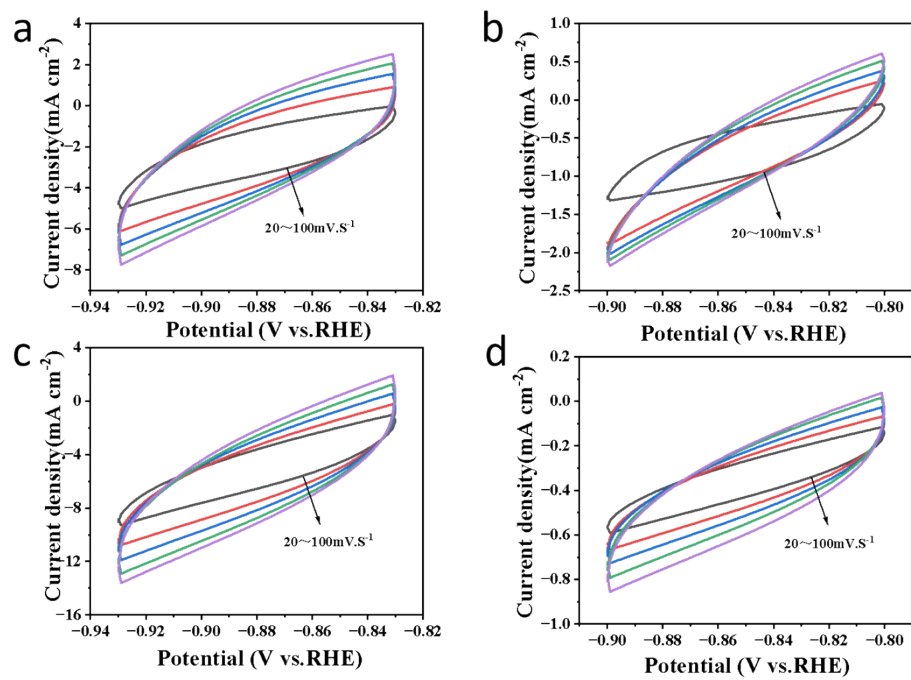

**Fig. S7.** HER-CV of (a) W-CoO/NF (b) W-CoSe200/NF (c) W-CoSe300/NF and (d) W-CoSe400/NF at different sweep speeds.

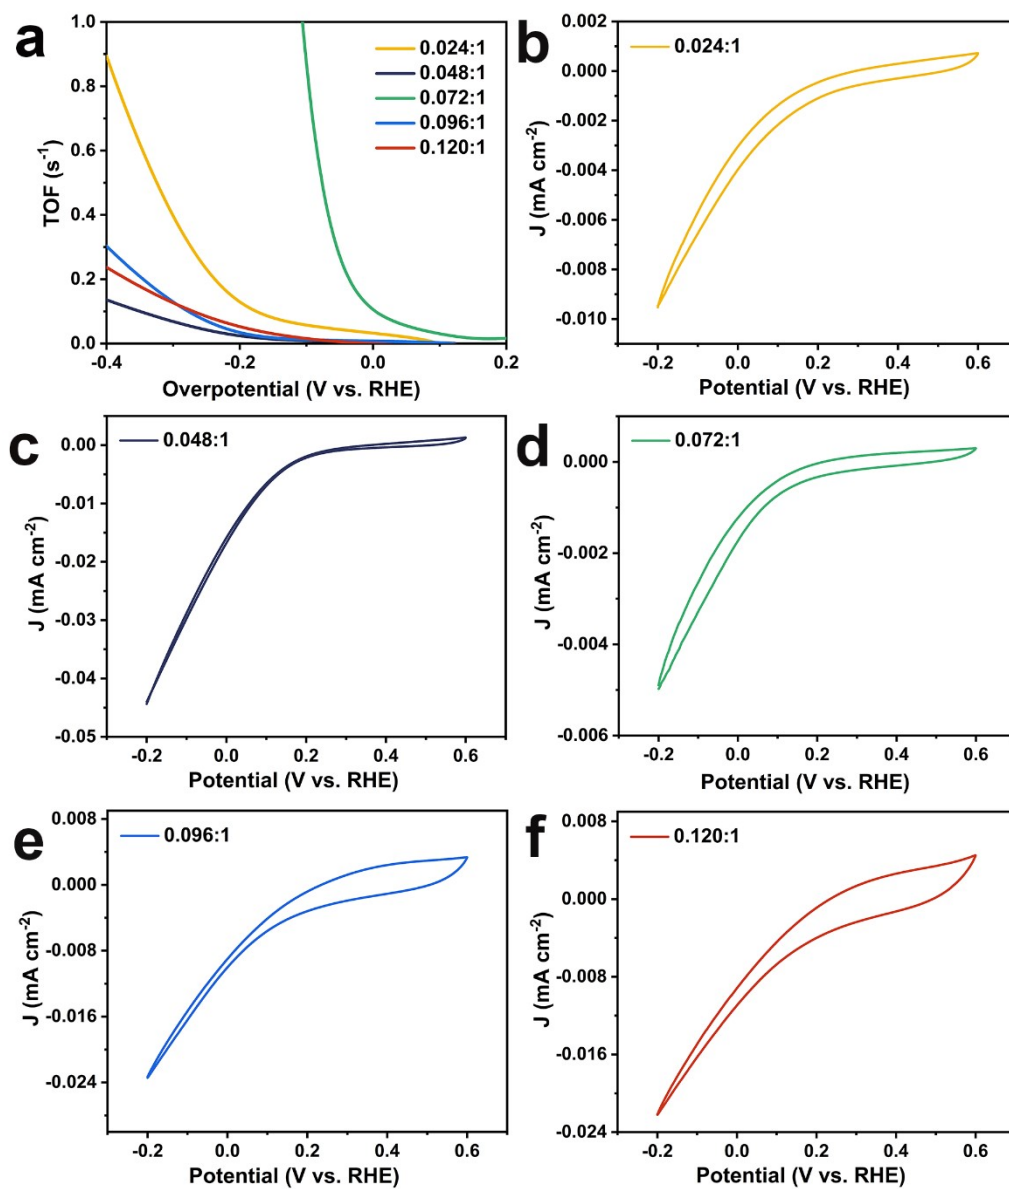

**Fig. S8.** The turnover frequency (TOF) of W-CoSe<sub>300</sub>/NF electrocatalysts with different M (H<sub>3</sub>PW<sub>12</sub>O<sub>40</sub>)/M (C<sub>4</sub>H<sub>6</sub>CoO<sub>4</sub>) ratios and their corresponding cyclic voltammetry (CV) curves (in PBS solution, pH ≈ 7).



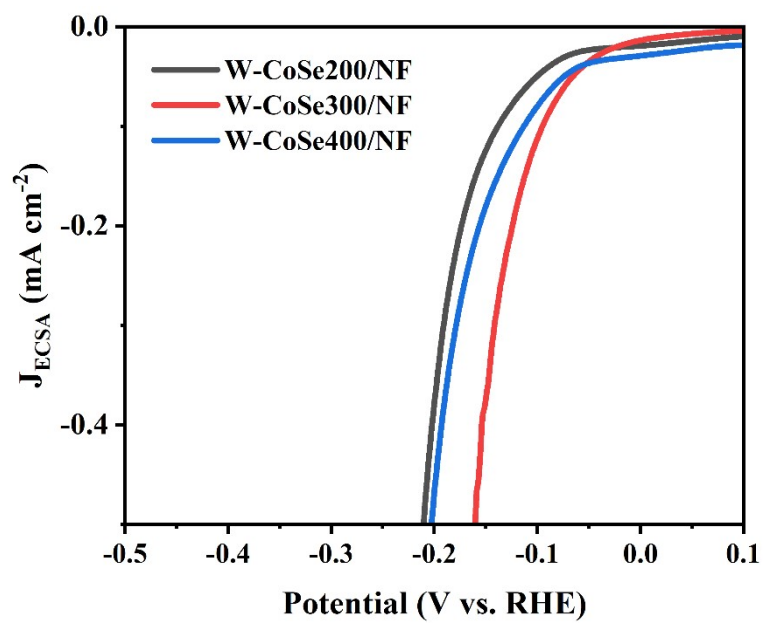

**Fig. S9.** LSV curves of W-CoSe200/NF, W-CoSe300/NF, and W-CoSe400/NF electrocatalyst normalized by ECSA.

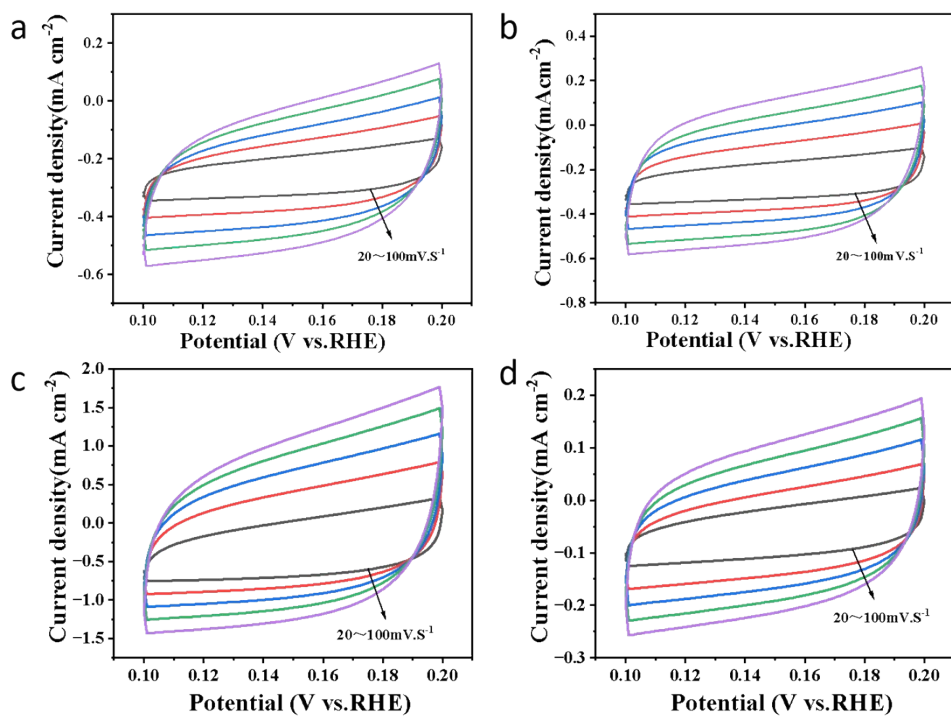

**Fig. S10.** OER-CV of (a) W-CoO/NF (b) W-CoSe200/NF (c) W-CoSe300/NF and (d) W-CoSe400/NF at different sweep speeds.

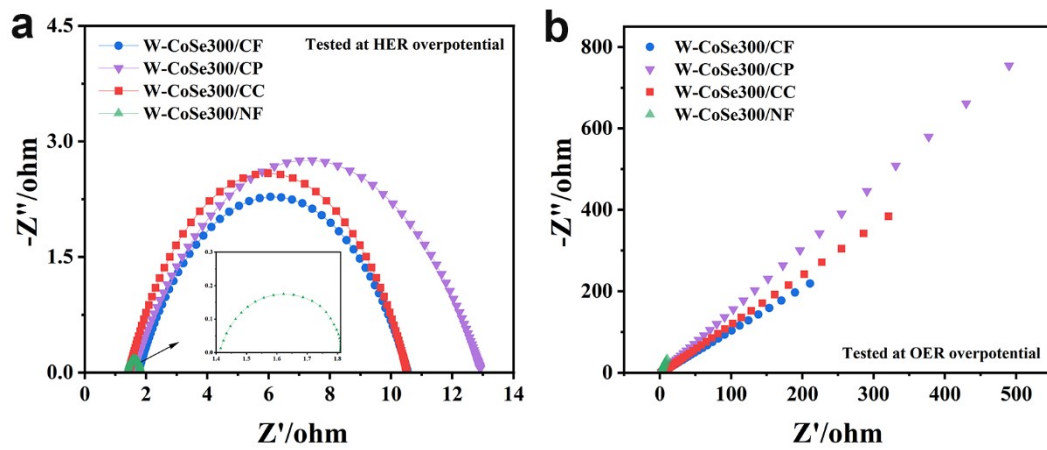

**Fig. S11.** EIS Nyquist plots of W-CoSe300 electrocatalysts loaded on different conductive substrates.

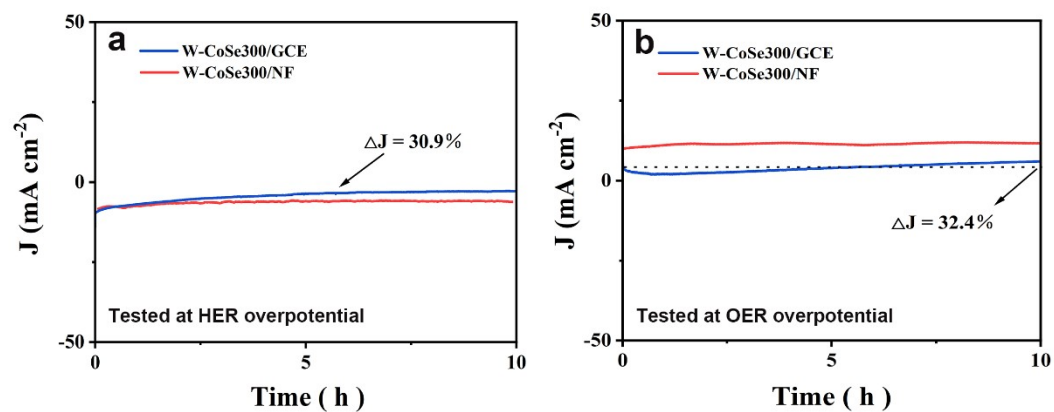

**Fig. S12.** Stability tests of W-CoSe300/GCE and W-CoSe300/NF electrocatalysts under HER and OER overpotentials (GCE = glassy carbon electrode).

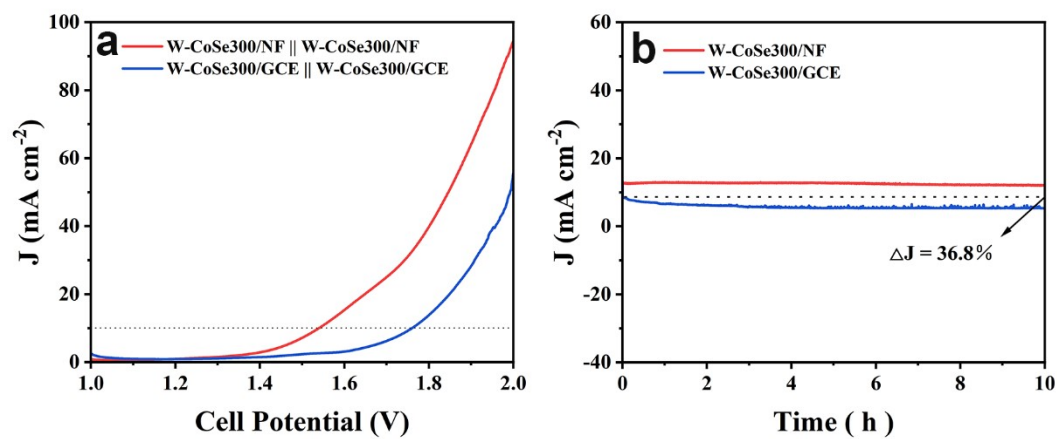

**Fig. S13.** OWS performance of W-CoSe300/GCE (GCE = glassy carbon electrode) and W-CoSe300/NF electrocatalysts: (a) LSV curves, (b) electrochemical stability test.

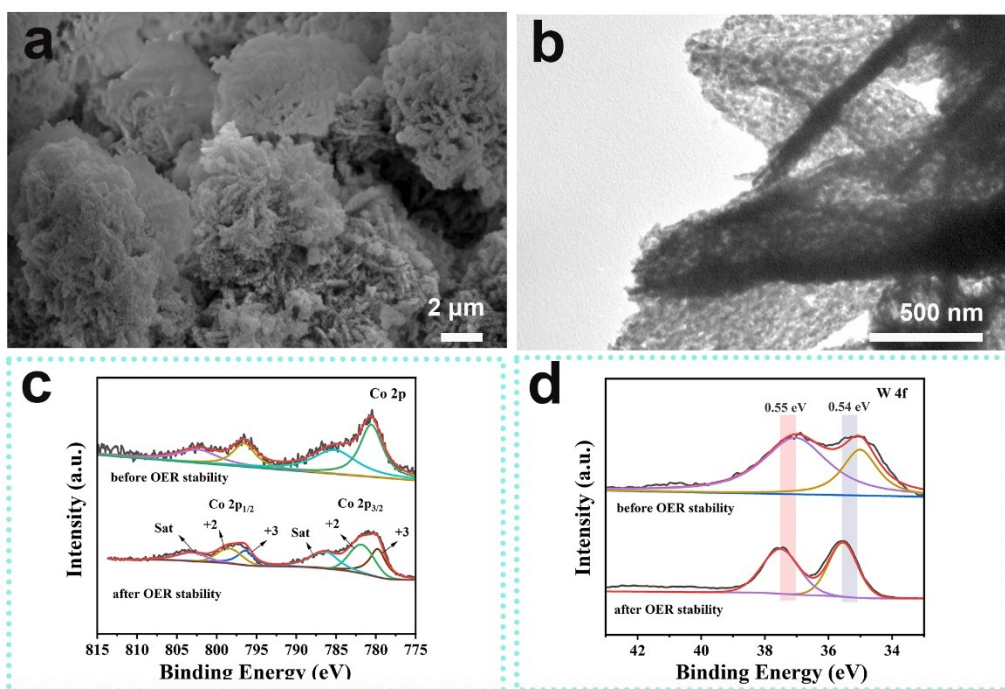

**Fig. S14.** Characterization analysis of the W-CoSe300/NF electrocatalyst after OER stability testing: (a) SEM image, (b) TEM image, (c, d) XPS spectra.
